# Supplementary material for: Evaluation of information flows in the RAS-MAPK system using transfer entropy measurements
Source: eLife journal article supplement (doi:10.7554/elife.104432), 2025-02-12
Supplement: fig5-data1 [file elife-104432-fig5-data1-v1.zip]

Repeat 1

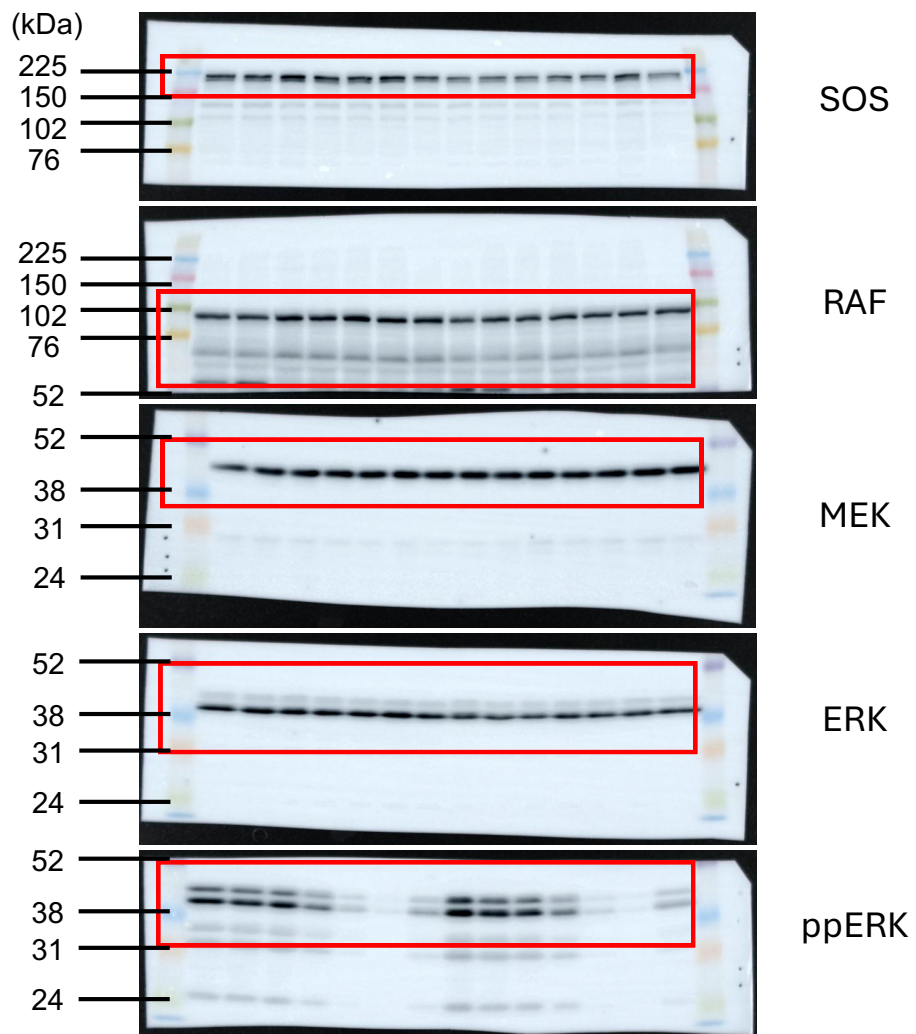

Figure 5a -source data 1-1

Repeat 2

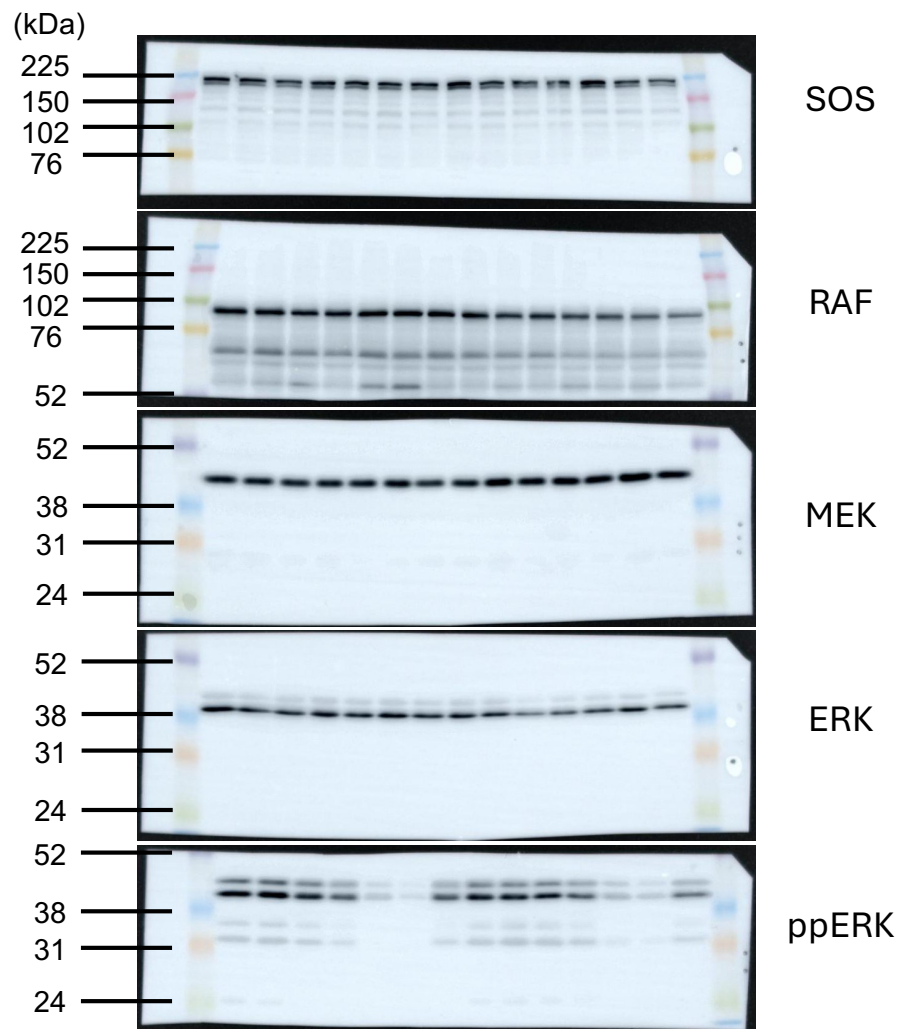

Figure 5a -source data 1-2

Repeat 3

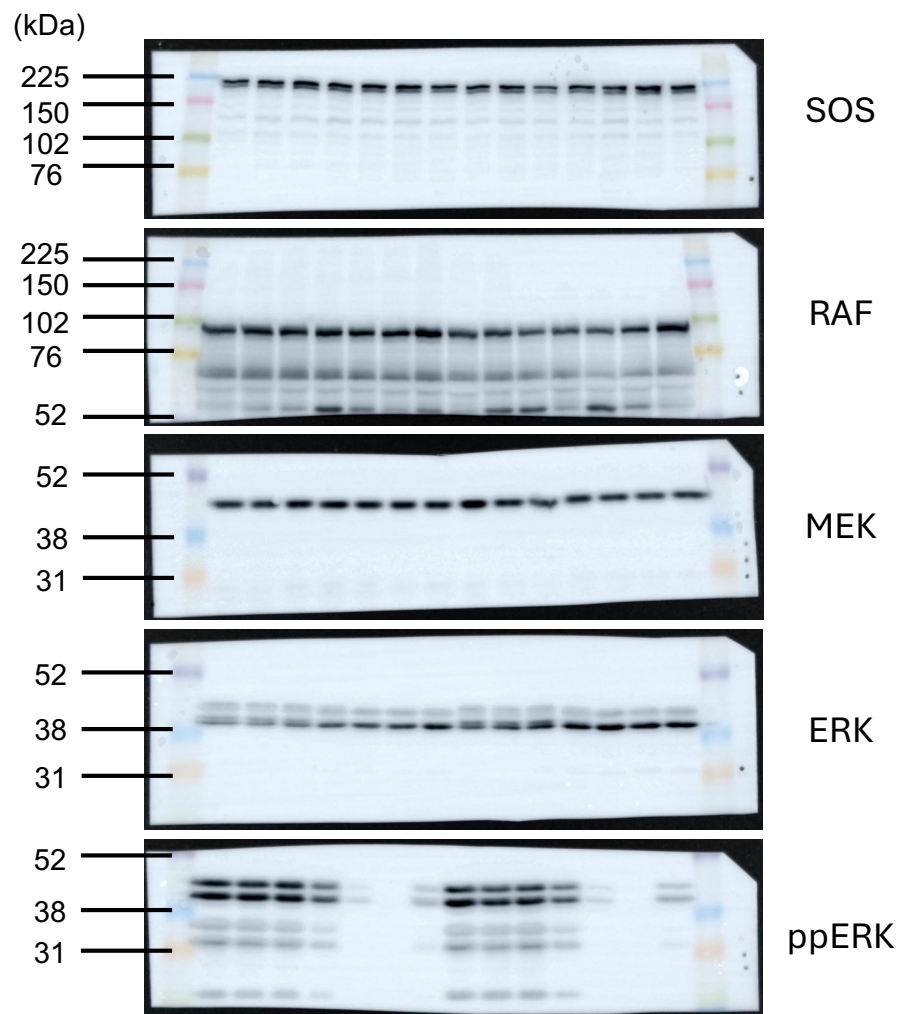

Figure 5a -source data 1-3

Repeat 4

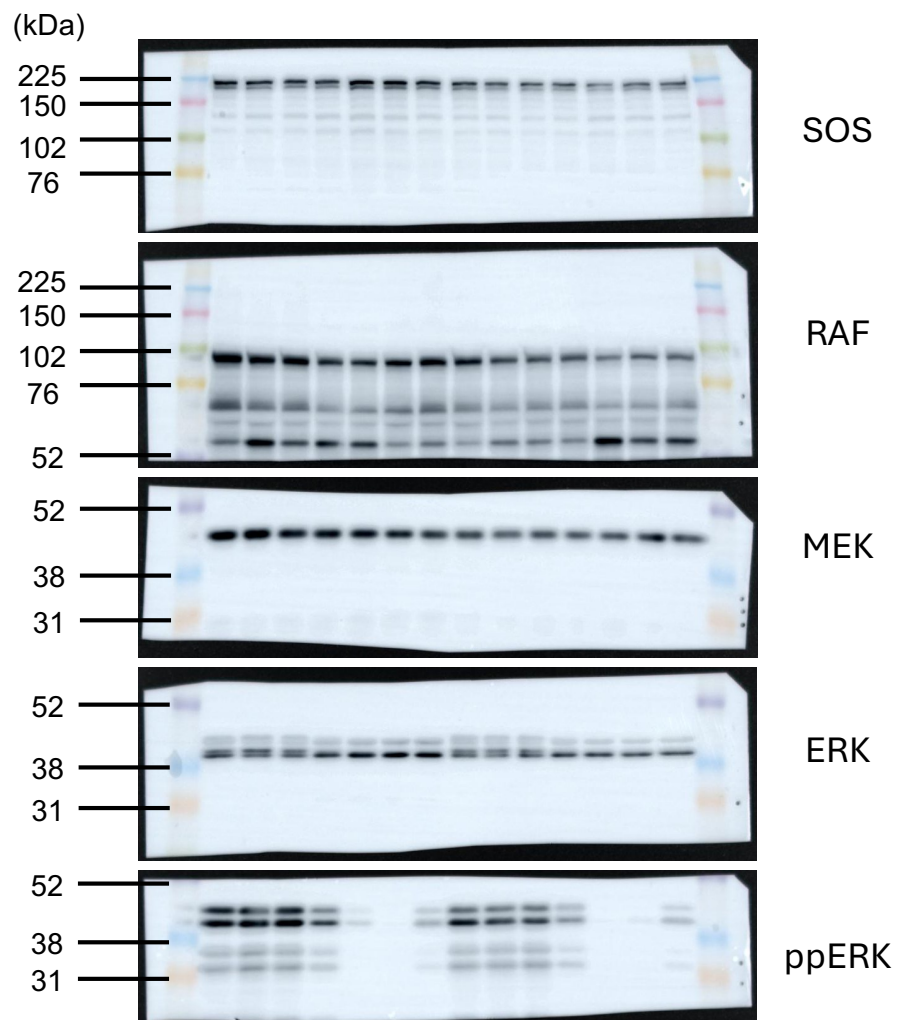

Figure 5a -source data 1-4
