# Supplementary figures and images for: Evaluation of information flows in the RAS-MAPK system using transfer entropy measurements
Source: eLife journal article supplement (doi:10.7554/elife.104432), 2025-02-12

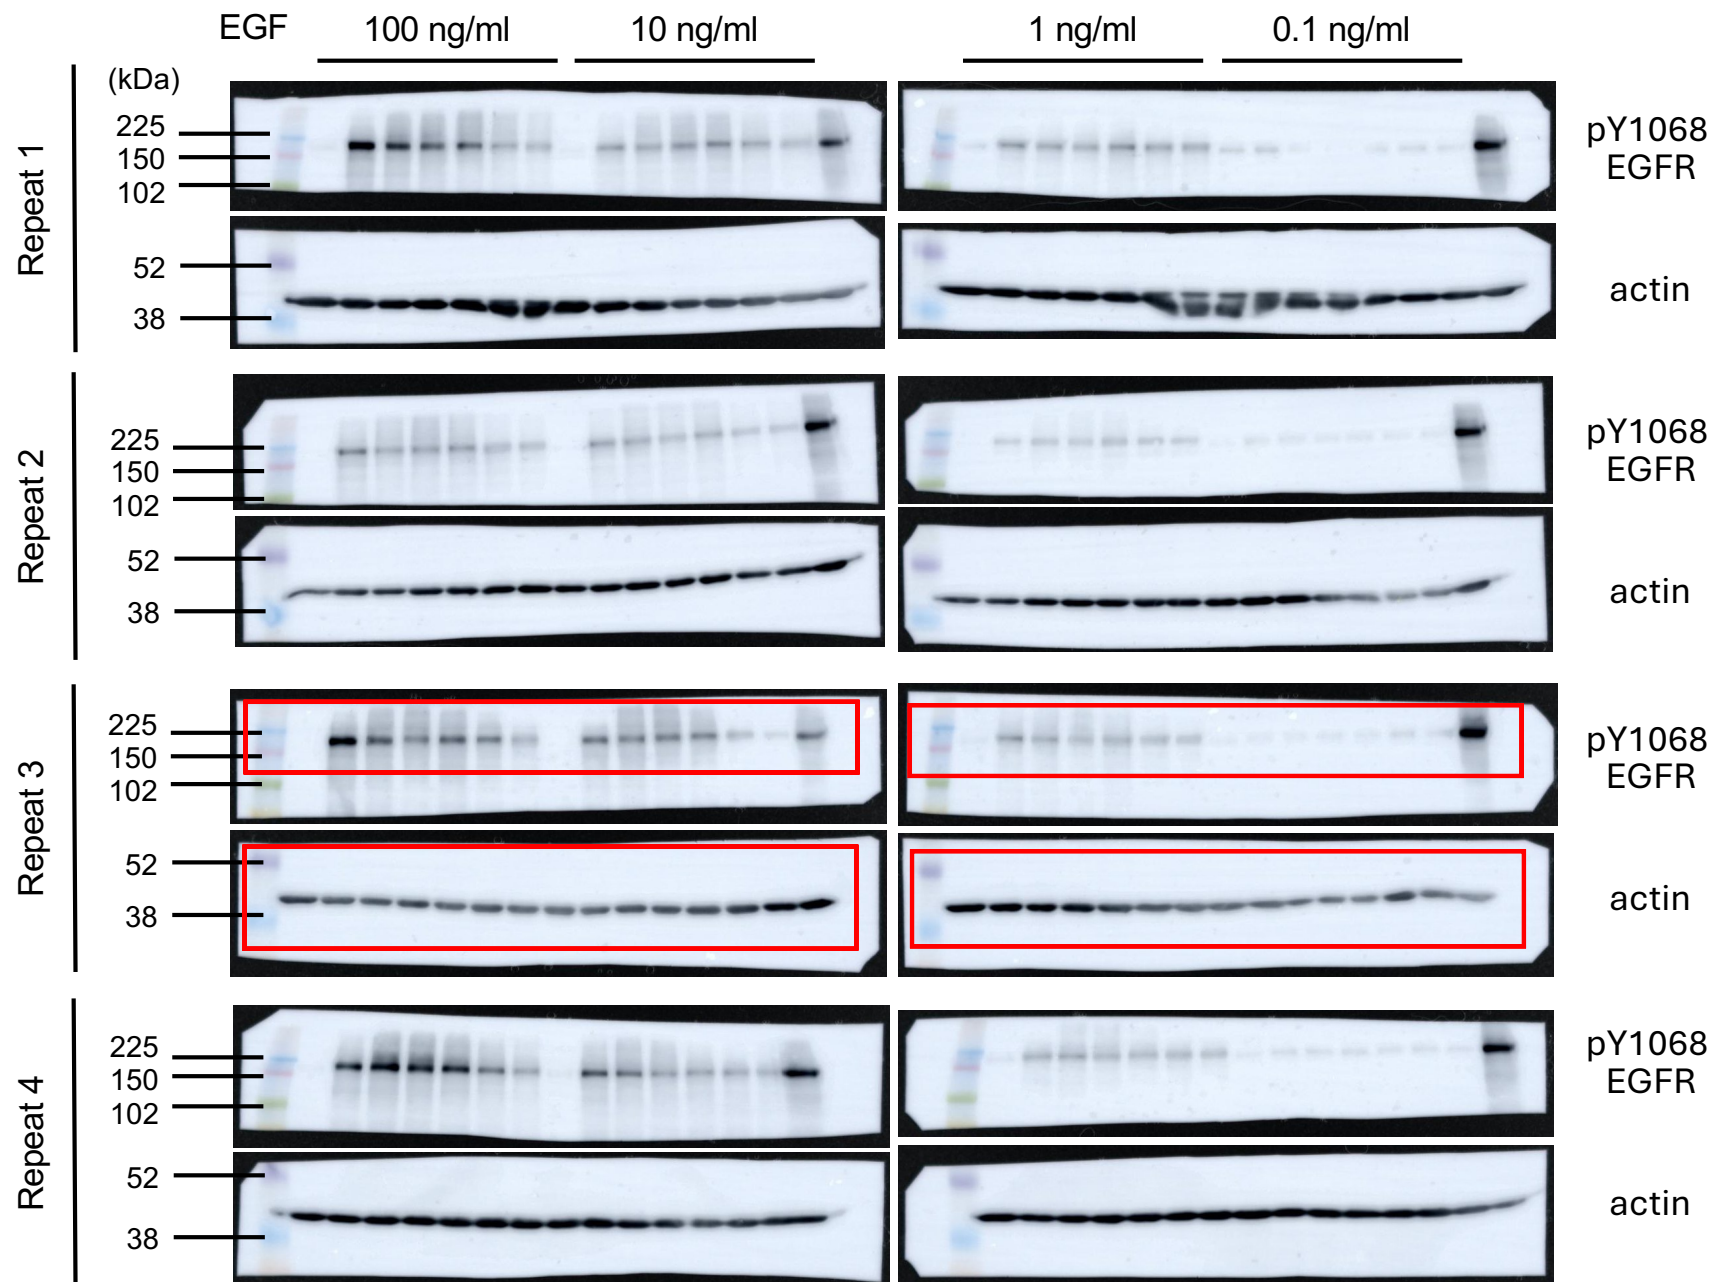

Appendix Figure 10\_Source data 1

Supplement: app1-fig10-data1 [file elife-104432-app1-fig10-data1-v1.zip]

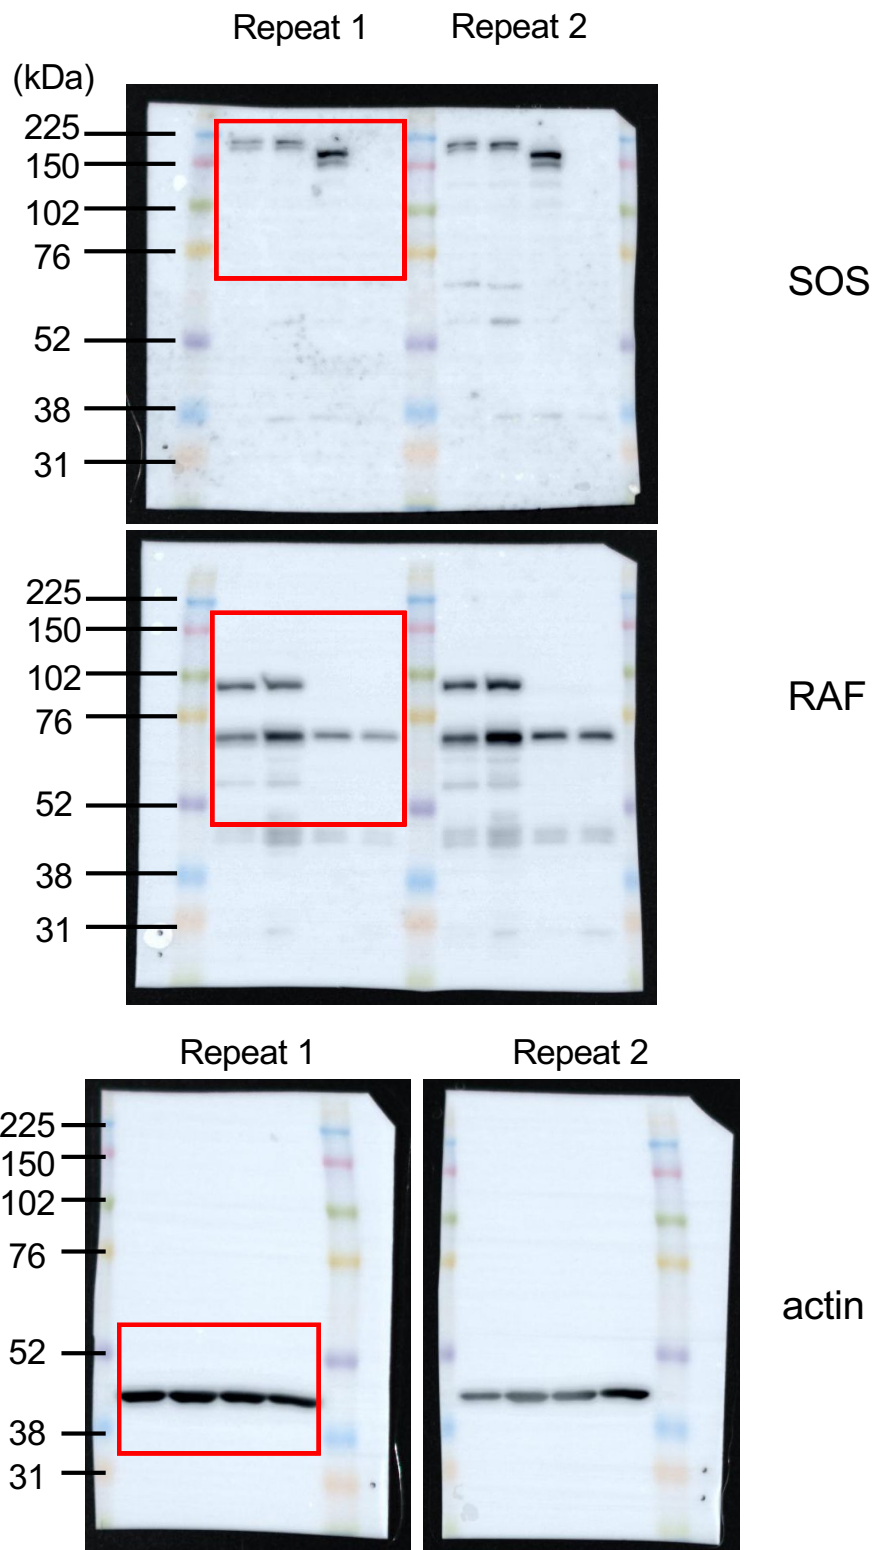

Figure 1a -source data 1

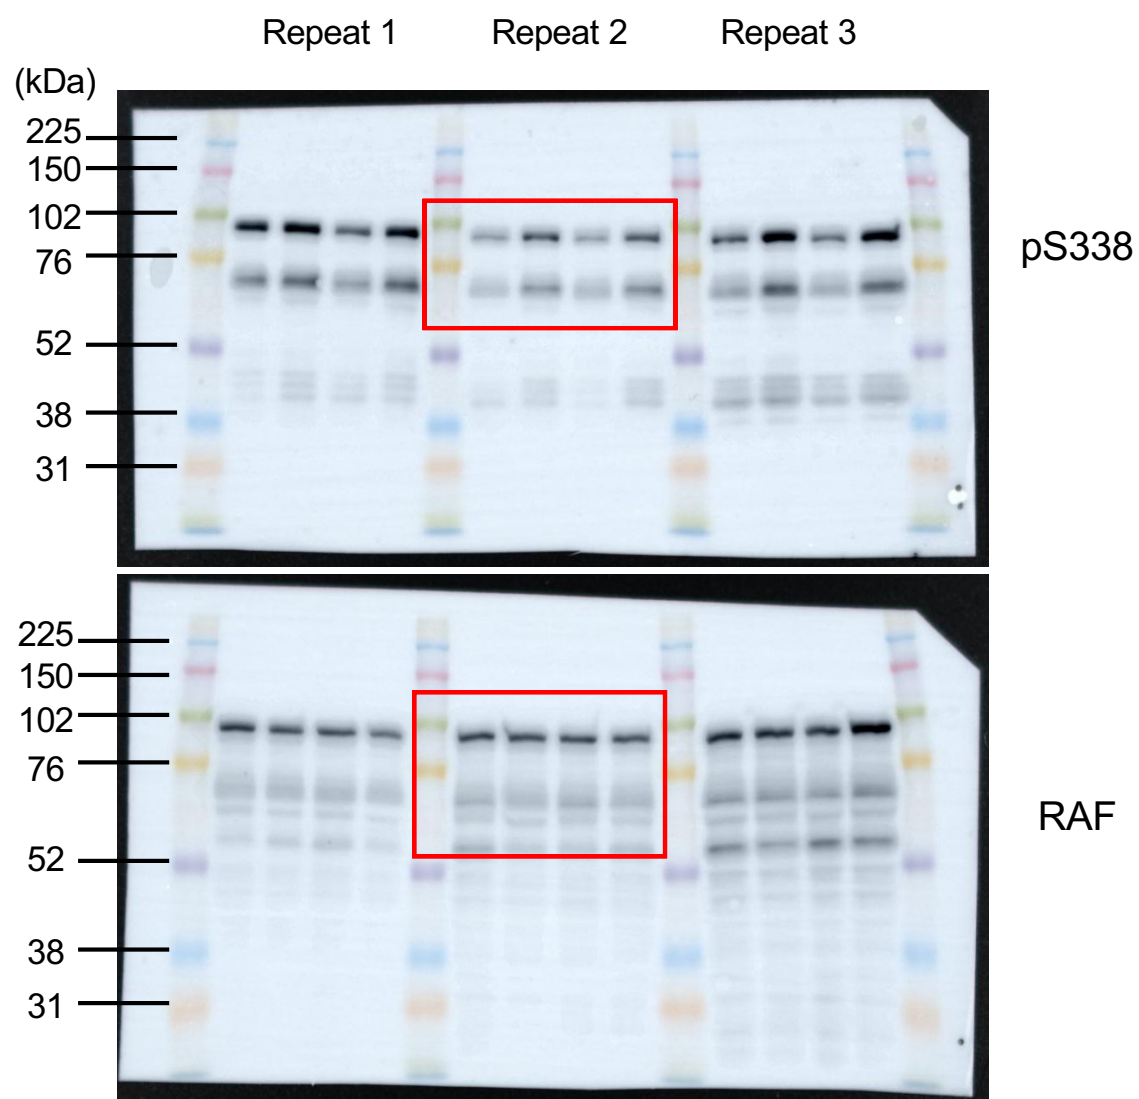

Figure 1b -source data 1

Supplement: fig1-data1 [file elife-104432-fig1-data1-v1.zip]
